# Supplementary material for: Eicosanoid Profile of Influenza A Virus Infected Pigs
Source: MDPI journal article supplement (doi:10.3390/metabo9070130), 2019-07-03
Supplement: s1 [file s1]

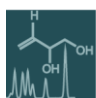

Table S1. MRM parameters for analyzed eicosanoids with qualifier<sup>1</sup> and quantifier<sup>2</sup> ion.

| compound                                | precursor ion | product ion | fragmentor [V] | collision energy [V] | cell accelerator voltage [v] | retention time [min] |
|-----------------------------------------|---------------|-------------|----------------|----------------------|------------------------------|----------------------|
| 14,15-EET <sup>1</sup>                  | 319.2         | 219.1       | 100            | 8                    | 4                            | 18.25                |
| 14,15-EET <sup>2</sup>                  | 319.2         | 175.1       | 100            | 10                   | 1                            | 18.25                |
| 11,12-EET <sup>1</sup>                  | 319.2         | 179.0       | 100            | 8                    | 1                            | 18.50                |
| 11,12-EET <sup>2</sup>                  | 319.2         | 167.2       | 100            | 12                   | 2                            | 18.50                |
| 8,9-EET <sup>1</sup>                    | 319.2         | 154.9       | 100            | 8                    | 1                            | 18.40                |
| 8,9-EET <sup>2</sup>                    | 319.2         | 151.0       | 100            | 10                   | 1                            | 18.40                |
| 5,6-EET <sup>1</sup>                    | 319.2         | 191.0       | 100            | 2                    | 1                            | 18.60                |
| 5,6-EET <sup>2</sup>                    | 319.2         | 99.0        | 100            | 16                   | 1                            | 18.60                |
| 5,15-DiHETE <sup>1</sup>                | 335.3         | 255.3       | 100            | 12                   | 3                            | 15.50                |
| 5,15-DiHETE <sup>2</sup>                | 335.3         | 173.2       | 100            | 12                   | 6                            | 15.50                |
| 20-HETE <sup>1</sup>                    | 319.2         | 288.9       | 140            | 12                   | 2                            | 16.90                |
| 20-HETE <sup>2</sup>                    | 319.2         | 237.0       | 140            | 10                   | 3                            | 16.90                |
| 15-HETE <sup>1</sup>                    | 319.2         | 219.2       | 120            | 4                    | 4                            | 17.45                |
| 15-HETE <sup>2</sup>                    | 319.2         | 120.9       | 120            | 12                   | 3                            | 17.45                |
| 12-HETE <sup>1</sup>                    | 319.2         | 163.0       | 120            | 12                   | 1                            | 17.70                |
| 12-HETE <sup>2</sup>                    | 319.2         | 135.2       | 120            | 12                   | 3                            | 17.70                |
| 5-HETE <sup>1</sup>                     | 319.2         | 203.3       | 100            | 12                   | 5                            | 17.80                |
| 13-HODE <sup>1</sup>                    | 295.2         | 277.2       | 100            | 10                   | 2                            | 17.25                |
| 13-HODE <sup>2</sup>                    | 295.2         | 195.1       | 100            | 14                   | 1                            | 17.25                |
| 9-HODE <sup>1</sup>                     | 295.2         | 171.0       | 100            | 10                   | 1                            | 17.30                |
| 9-HODE <sup>2</sup>                     | 295.2         | 123.1       | 100            | 14                   | 3                            | 17.30                |
| 17-HDHA <sup>1</sup>                    | 343.2         | 245.1       | 100            | 8                    | 3                            | 17.50                |
| 17-HDHA <sup>2</sup>                    | 343.2         | 201.1       | 100            | 10                   | 4                            | 17.50                |
| 14-HDHA <sup>1</sup>                    | 343.2         | 234.1       | 100            | 10                   | 4                            | 17.60                |
| 14-HDHA <sup>2</sup>                    | 343.2         | 161.2       | 100            | 8                    | 1                            | 17.60                |
| 15-HEPE <sup>1</sup>                    | 317.2         | 255.3       | 100            | 4                    | 2                            | 17.00                |
| 15-HEPE <sup>2</sup>                    | 317.2         | 219.2       | 100            | 4                    | 4                            | 17.00                |
| Leukotriene B <sub>4</sub> <sup>1</sup> | 335.2         | 194.9       | 120            | 8                    | 6                            | 15.70                |
| Leukotriene B <sub>4</sub> <sup>2</sup> | 335.2         | 58.9        | 120            | 6                    | 3                            | 15.70                |
| 6-keto PG F <sub>1a</sub> <sup>1</sup>  | 369.2         | 206.8       | 100            | 12                   | 4                            | 2.60                 |
| 6-keto PG F <sub>1a</sub> <sup>2</sup>  | 369.2         | 162.8       | 100            | 24                   | 4                            | 2.60                 |
| PG D <sub>2</sub> <sup>1</sup>          | 351.3         | 271.2       | 80             | 12                   | 2                            | 11.00                |
| PG D <sub>2</sub> <sup>2</sup>          | 351.3         | 233.1       | 80             | 8                    | 3                            | 11.00                |
| PG E <sub>2</sub> <sup>1</sup>          | 351.3         | 315.2       | 80             | 8                    | 5                            | 9.70                 |
| PG E <sub>2</sub> <sup>2</sup>          | 351.3         | 271.1       | 80             | 12                   | 2                            | 9.70                 |
| PG J <sub>2</sub> <sup>1</sup>          | 333.2         | 271.3       | 80             | 12                   | 2                            | 14.80                |
| PG J <sub>2</sub> <sup>2</sup>          | 333.2         | 233.1       | 80             | 4                    | 4                            | 14.80                |
| PG F <sub>2a</sub> <sup>1</sup>         | 353.2         | 317.1       | 100            | 12                   | 5                            | 8.30                 |
| PG F <sub>2a</sub> <sup>2</sup>         | 353.2         | 308.9       | 100            | 12                   | 8                            | 8.30                 |
| Thromboxane B <sub>2</sub> <sup>1</sup> | 369.2         | 195.1       | 100            | 6                    | 3                            | 5.90                 |
| Thromboxane B <sub>2</sub> <sup>2</sup> | 369.2         | 169.0       | 100            | 8                    | 6                            | 5.90                 |
| Protectin DX <sup>1</sup>               | 359.2         | 206.1       | 100            | 12                   | 4                            | 15.70                |
| Protectin DX <sup>2</sup>               | 359.2         | 153.1       | 100            | 12                   | 1                            | 15.70                |
| Resolvin D <sub>5</sub> <sup>1</sup>    | 359.2         | 199.2       | 80             | 10                   | 5                            | 15.65                |
| Resolvin D <sub>5</sub> <sup>2</sup>    | 359.2         | 141.0       | 80             | 10                   | 2                            | 15.65                |
| 12-HETE-d8                              | 327.2         | 214.0       | 100            | 12                   | 4                            | 17.7                 |

|                |       |       |     |    |   |       |
|----------------|-------|-------|-----|----|---|-------|
| 13-HODE-d4     | 299.3 | 198.2 | 100 | 14 | 6 | 17.25 |
| PG E2-d4       | 355.3 | 275.3 | 100 | 12 | 2 | 10.00 |
| Resolvin D1-d5 | 381.2 | 141.0 | 100 | 12 | 2 | 13.90 |

**Table S2.** MRM parameters for analyzed eicosanoids precursors with qualifier<sup>1</sup> and quantifier<sup>2</sup> ion.

| compound                   | precursor ion | product ion | fragmentor [V] | collision energy [V] | cell accelerator voltage [v] | retention time [min] |
|----------------------------|---------------|-------------|----------------|----------------------|------------------------------|----------------------|
| AA <sup>1</sup>            | 303.2         | 259.1       | 80             | 8                    | 2                            | 5.70                 |
| AA <sup>2</sup>            | 303.2         | 146.9       | 80             | 6                    | 1                            | 5.70                 |
| EPA <sup>1</sup>           | 301.2         | 257.2       | 100            | 6                    | 2                            | 5.00                 |
| EPA <sup>2</sup>           | 301.2         | 203.2       | 100            | 10                   | 4                            | 5.00                 |
| DHA <sup>1</sup>           | 327.3         | 283.2       | 100            | 4                    | 2                            | 5.50                 |
| DHA <sup>2</sup>           | 327.3         | 309.1       | 100            | 10                   | 2                            | 5.50                 |
| Linoleic acid <sup>1</sup> | 279.2         | 261.3       | 100            | 14                   | 7                            | 5.80                 |
| Linoleic acid <sup>2</sup> | 279.2         | 234.9       | 100            | 12                   | 4                            | 5.80                 |
| AA-d11                     | 314.3         | 270.3       | 100            | 10                   | 2                            | 5.70                 |

Abbreviations: hydroxyeicosatrienoic acid (HETE), hydroxydocosahexaenoic acid (HDHA), epoxyeicosatrienoic acid (EET), hydroxyeicosapentaenoic acid (HEPE), hydroxyoctadecadienoic acid (HODE), prostaglandin (PG), arachidonic acid (AA), eicosapentaenoic acid (EPA) and docosahexaenoic acid (DHA).
